# Supplementary material for: Enhancing Cr (VI) Adsorption of Chestnut Shell Biochar through H3PO4 Activation and Nickel Doping
Source: MDPI journal article supplement (doi:10.3390/molecules29102220), 2024-05-09
Supplement: s1 [file s1]

## **Supplementary Material for**

# **Enhancing Cr (VI) adsorption of chestnut-shell biochar through H<sub>3</sub>PO<sub>4</sub> activation and nickel doping**

Hu Wen<sup>1#</sup>, Zhang Xiaojing<sup>2#</sup>, Chen Ming<sup>2</sup>, Rahman Sheikh Tamjidur<sup>2</sup>, Li Xin<sup>2</sup>, Wang Geming<sup>2, 3\*</sup>

(1. School of Information Engineering, Hubei University of Economics, Wuhan 430205, China; 2. Provincial Key Laboratory of Plasma Chemistry and Advanced Materials, Wuhan Institute of Technology, Wuhan 430073, China; 3. Hubei Key Laboratory of Industrial Fume and Dust Pollution Control, Jiangnan University, Wuhan 430056, China)

Corresponding authors

E-mail address: wanggemingwit@163.com (G. Wang)

Tel: +86-027-87195661; Fax: +86-027-87195661

<sup>#</sup> Hu Wen and Zhang Xiaojing contributed equally to this work.

## 1. Experimental

### 1.1 Chemicals

Chestnut shells (residue from the manufacturer) were obtained from Wuhan, Hubei Province, China. All chemicals in our experiments were analytical reagent grade and used without further purification. Potassium dichromate ( $K_2Cr_2O_7$ ), phosphoric acid ( $H_3PO_4$ ), hydrochloric acid (HCl), sulfuric acid ( $H_2SO_4$ ), sodium hydroxide (NaOH) and nickel chloride hexahydrate ( $NiCl_2 \cdot 6H_2O$ ) were obtained from Sinopharm Chemical Reagent Co., Ltd., China. Deionized water was used for all experiments.

### 1.2 Biochar preparation

The original chestnut shells were washed, dried, ground and crushed, and then passed through a 50-mesh sieve. The chestnut shell-based porous biochar was synthesized by two-step  $H_3PO_4$ -assistant activation method. The treated chestnut shells were heated to 600 °C at 5 °C/min in a tubular furnace under  $N_2$  atmosphere and held for 2 h. The resulting products were washed, filtered and dried and passed through a 100-mesh sieve, which were recorded as BC. The sieved BC and  $H_3PO_4$  were mixed in a mass ratio of 1:2 (BC:  $H_3PO_4$ =1:2) and dissolved in an appropriate amount of deionized water, and then the mixture was ultrasonically vibrated for 1 h, magnetically stirred for 6 h and dried. Subsequently, the mixture was heated to 950 °C at a rate of 5 °C/min under  $N_2$  atmosphere and maintained for 3 h. The resulting products were washed and dried to obtain chestnut shell-based porous biochar, which was named as PC. The as-prepared PC and  $NiCl_2 \cdot 6H_2O$  were dissolved in an appropriate amount of deionized water at different mass ratios (PC:  $NiCl_2 \cdot 6H_2O$  = 3:1, 1:1, 1:3), and magnetically stirred for 12h after ultrasonication for 1 h. After drying, the mixtures were calcined at 800 °C for 1 h under  $N_2$  atmosphere, and stored for later use after natural cooling, washing and drying. The final chestnut shell-based porous biochar (abbreviate as PCNi) was recorded as PCNi<sub>1</sub>, PCNi<sub>2</sub> and PCNi<sub>3</sub>, respectively. The PCNi<sub>3</sub> after the absorption process of Cr (VI) was recorded as PCNi<sub>3</sub>-Cr.

### 1.3 Biochar characterization

The crystalline structures of samples were acquired by X-ray powder diffraction (XRD, Germany Brucker D8 ADVANCE) using Cu K $\alpha$  radiation ( $\lambda$  = 1.5406 Å, 2 $\theta$

=10°-80°). The surface feature, microstructure and chemical compositions of PC, PCNi and PCNi<sub>3</sub>-Cr were investigated by a field emission scanning electron microscope (FE-SEM, ZEISS GeminiSEM 300) equipped with an energy-dispersive spectroscopy (EDS) mapping instrument was employed to determine surface element contents. Raman spectra (Raman, Thermo Fisher DXR) of BC, PC and PCNi<sub>3</sub> were obtained to analyze the variation of carbon defect and graphitization degree. The surface chemical functional groups of BC, PC and PCNi<sub>3</sub> are characterized by using a Nicolet 6700 Fourier transform-infrared (FT-IR) spectrophotometer. The pore volume, pore-size distribution and the Brunauer-Emmett-Teller (BET) specific surfaces areas of BC, PC and PCNi<sub>3</sub> were measured by a BET specific surface area analyzer (Mike ASAP2020) following the multipoint N<sub>2</sub> adsorption/desorption BET method. The related data are calculated from the N<sub>2</sub> adsorption isotherms by using the Brunauer-Emmett-Teller (BET) and density functional theory (DFT) method. X-ray photoelectron spectroscopy (XPS, Thermo Fisher ESCALAB XI+) was carried out to explore the surface chemical compositions and elemental valence states of PC, PCNi<sub>3</sub> and PCNi<sub>3</sub>-Cr. The room-temperature magnetic properties of PCNi<sub>3</sub> were investigated with vibrating sample magnetometer (VSM, Lakeshore 7404).

#### 1.4 Adsorption experiments

All adsorption experiments of as-prepared biochar were conducted in 150 ml conical flasks containing 100 ml of Cr (VI) solution with biochar dosage of 20 mg. In order to ensure adequate adsorption, the conical flasks were shaken in a thermostat oscillator with 150 rpm. Batch experiments were carried out to reveal adsorption behavior and mechanism *via* initial solution pH, initial Cr (VI) solution concentration, reaction time and temperature. The influence of pH on Cr (VI) solution toward biochar were recorded by dropping 0.1 mol/ L H<sub>2</sub>SO<sub>4</sub> or 0.1 mol/L NaOH to adjust initial pH value of the reaction solution from 2.0 to 8.0 while maintaining Cr (VI) concentration at 50 mg L<sup>-1</sup> for 1440 min. The suitable solution pH was determined as a fixed value (pH 2.0) for the following adsorption experiments. The impacts of key changes include initial Cr (VI) solution concentration (5, 10, 25, 50, 100, 200, 300, 400, 500 and 600 mg L<sup>-1</sup>), reaction time (10, 20, 30, 60, 90, 120, 180, 360, 540, 720, and 1440 min) and

temperature (298, 303, 308, 318 and 323K) on adsorption capacity toward Cr (VI) have been studied by adsorption experiments. The reaction solution was filtered through a 0.22  $\mu\text{m}$  syringe filter and collected before the final concentration was tested. Furthermore, the pseudo-first order kinetic, pseudo-second order kinetics kinetic, Elovich and intra-particle diffusion were used to fit experiment data, and the thermodynamic parameters including entropy ( $\Delta S^0$ ,  $\text{J mol}^{-1} \text{K}^{-1}$ ), enthalpy ( $\Delta H^0$ ,  $\text{KJ mol}^{-1}$ ) and Gibbs free energy ( $\Delta G^0$ ,  $\text{KJ mol}^{-1}$ ) were also calculated.

## 1.5 Data analysis

### 1.5.1 Adsorption capacity

The concentration of Cr (VI) was measured by diphenylcarbazide colorimetry with a UV-Vis spectrophotometer at 540 nm. The adsorption capacity ( $q_e$ ,  $\text{mg}\cdot\text{g}^{-1}$ ) were calculated by Eqs. (S1) and (S2):

$$\eta(\%) = \frac{C_o - C_e}{C_o} \times 100\% \quad (\text{S1})$$

$$q_e = \frac{(C_o - C_e)V}{m} \quad (\text{S2})$$

Where,  $C_o$  ( $\text{mg}\cdot\text{L}^{-1}$ ) and  $C_e$  ( $\text{mg}\cdot\text{L}^{-1}$ ) are the initial concentration and equilibrium concentrations,  $V$  (L) is the solution volume, and  $m$  (g) is the mass of biochar.

### 1.5.2 Kinetic model

According to Eqs. (S3) ~ (S6), the pseudo-first-order, pseudo-second, Intra-particle diffusion models and Elovich were used in turn to model the kinetics of Cr (VI) adsorption:

$$q_t = q_e(1 - e^{-k_1 t}) \quad (\text{S3})$$

$$q_t = \frac{k_2 t q_e^2}{1 + k_2 t q_e} \quad (\text{S4})$$

$$q_t = k_p t^{1/2} + C_i \quad (\text{S5})$$

$$q_t = \frac{1}{\beta} \ln(\alpha\beta) + \frac{1}{\beta} \ln t \quad (\text{S6})$$

In which,  $q_t$  ( $\text{mg}\cdot\text{g}^{-1}$ ) represent adsorption capacity at time  $t$ ;  $k_1$  ( $\text{min}^{-1}$ ),  $k_2$  ( $\text{g mg}^{-1} \text{min}^{-1}$ ) and  $k_p$  ( $\text{g mg}^{-1} \text{min}^{-1}$ ) are the corresponding rate constants for each model;  $\alpha$  ( $\text{mg g}^{-1} \text{min}^{-1}$ ) and  $\beta$  ( $\text{mg}\cdot\text{g}^{-1}$ ) are the initial adsorption rate and Elovich desorption constants;  $C_i$  is a constant and it represent the intercept of intra-particle diffusion plot.

### 1.5.2 Adsorption isotherms

According to Eqs. (S7) ~ (S9), three well-known isotherm models of Langmuir model considering a monolayer adsorption, Freundlich model considering a multilayer adsorption and Sips model considering the interaction force between the type of sorbent and adsorbent were carried out to study and predict the adsorption performance at equilibrium:

$$q_e = \frac{q_m K_L C_e}{1 + K_L C_e} \quad (S7)$$

$$q_e = K_F C_e^{1/n_F} \quad (S8)$$

$$q_e = q_s (K_S C_e)^{1/m} / [(1 + (K_S C_e)^{1/m})] \quad (S9)$$

In which,  $q_m$  ( $\text{mg} \cdot \text{g}^{-1}$ ) represent the Langmuir maximum adsorption capacity;  $q_e$  ( $\text{mg g}^{-1}$ ) is the adsorption capacity at equilibrium;  $C_e$  ( $\text{mg L}^{-1}$ ) mean the equilibrium concentration;  $K_L$  ( $\text{L mg}^{-1}$ ) relate to the constant of Langmuir;  $K_F$  [ $(\text{mg g}^{-1}) (\text{mg L}^{-1})^{-n}$ ] and  $n_F$  is the constant of Freundlich;  $K_S$  ( $\text{L mg}^{-1}$ ) and  $m$  are parameters of Sips adsorption model.

### 1.5.4 Thermodynamics studies

The corresponding thermodynamic parameters of entropy ( $\Delta S^0$ ,  $\text{KJ mol}^{-1} \text{K}^{-1}$ ), enthalpy ( $\Delta H^0$ ,  $\text{KJ mol}^{-1}$ ) and Gibbs free energy ( $\Delta G^0$ ,  $\text{KJ mol}^{-1}$ ) were calculated and determined based on Eqs. (S10) ~ (S12).

$$\Delta G = -RT \ln K_d \quad (S10)$$

$$K_d = \frac{q_e}{C_e} \quad (S11)$$

$$\ln K_d = \frac{\Delta S}{R} - \frac{\Delta H}{RT} \quad (S12)$$

Where,  $T$  (K) is the temperature,  $R$  ( $\text{J mol}^{-1} \text{K}^{-1}$ ) is the gas constant ( $\sim 8.314$ ), and  $K_d$  ( $\text{L g}^{-1}$ ) means the equilibrium constant.

## 2. Results

Table S1 the surface elemental compositions of biochar (PC and PCNi) by EDS

| sample                          | Elemental Compositions (%) |       |      |      |
|---------------------------------|----------------------------|-------|------|------|
|                                 | C                          | O     | P    | Ni   |
| PC                              | 92.43                      | 7.30  | 0.27 | —    |
| PC <sub>3</sub> Ni <sub>1</sub> | 86.50                      | 8.71  | 3.01 | 1.79 |
| PC <sub>1</sub> Ni <sub>1</sub> | 65.26                      | 18.14 | 5.72 | 8.77 |
| PC <sub>1</sub> Ni <sub>3</sub> | 64.41                      | 21.68 | 4.07 | 8.31 |

Table S2 the pore structure parameters (textural properties) of PC and PCNi<sub>3</sub> by BET and DFT method

| Pore structure parameters                                | PC      | PCNi <sub>3</sub> |
|----------------------------------------------------------|---------|-------------------|
| specific surface area (m <sup>2</sup> ·g <sup>-1</sup> ) | 1521.55 | 1775.94           |
| microporous area (m <sup>2</sup> ·g <sup>-1</sup> )      | 1076.77 | 1235.85           |
| total pore volume (cm <sup>3</sup> ·g <sup>-1</sup> )    | 0.80    | 0.97              |
| micro pore volume (cm <sup>3</sup> ·g <sup>-1</sup> )    | 0.63    | 0.73              |
| average pore size (nm)                                   | 2.11    | 2.18              |
